# Supplementary material for: Structurally characterized homo-trinuclear ZnII and hetero-pentanuclear [ZnII4LnIII] complexes constructed from an octadentate bis(Salamo)-based ligand: Hirshfeld surfaces, fluorescence and catalytic properties
Source: Royal Society of Chemistry journal article supplement (doi:10.1039/c9nj00014c), 2019-01-01
Supplement: c9nj00014c1.pdf [file c9nj00014c1.pdf]

## Supporting Information

### **Structural characterized homo-trinuclear Zn<sup>II</sup> and hetero-pentanuclear [Zn<sup>II</sup><sub>4</sub>Ln<sup>III</sup>] complexes constructed from a octadentate bis(Salamo)-based ligand: hirshfeld surfaces, fluorescent and catalytic properties**

Xiao-Yan Li, Quan-Peng Kang, Chang Liu, Yang Zhang Wen-Kui Dong\*

School of Chemical and Biological Engineering, Lanzhou Jiaotong University, Lanzhou, Gansu  
730070, PR China

Corresponding authors.

\*E-mail: dongwk@126.com. Fax: +86-931-4938703.

---

\* School of Chemical and Biological Engineering, Lanzhou Jiaotong University,  
Lanzhou 730070, P. R. China. E-mail: dongwk@126.com; Tel: +86 931 4938703

† CCDC: numbers 1875819-1875824 for complexes 1–6.

**Table S1** Selected bond lengths (Å) and angles (°) for complexes **1-6**.

| Complex 1                              |            |                                        |            |                                        |            |
|----------------------------------------|------------|----------------------------------------|------------|----------------------------------------|------------|
| Bond                                   | Lengths    | Bond                                   | Lengths    | Bond                                   | Lengths    |
| N1-Zn6                                 | 2.129(4)   | N2-Zn6                                 | 2.121(4)   | N3-Zn4                                 | 2.116(4)   |
| N4-Zn4                                 | 2.118(4)   | N5-Zn1                                 | 2.116(4)   | N6-Zn1                                 | 2.092(4)   |
| N7-Zn2                                 | 2.114(4)   | N8-Zn2                                 | 2.108(4)   | O1-Zn6                                 | 2.046(3)   |
| O1-Zn5                                 | 2.054(3)   | O4-Zn6                                 | 1.969(3)   | O5-Zn6                                 | 1.979(4)   |
| O6-Zn5                                 | 1.988(4)   | O7-Zn5                                 | 1.985(3)   | O8-Zn4                                 | 1.971(4)   |
| O9-Zn4                                 | 2.056(3)   | O9-Zn5                                 | 2.071(3)   | O10-Zn4                                | 1.954(3)   |
| O13-Zn5                                | 2.033(3)   | O14-Zn1                                | 1.959(3)   | O17-Zn1                                | 2.036(3)   |
| O17-Zn3                                | 2.055(3)   | O18-Zn3                                | 2.068(3)   | O20-Zn1                                | 1.985(3)   |
| O18-Zn2                                | 2.046(3)   | O19-Zn3                                | 1.998(3)   | O21-Zn3                                | 2.021(3)   |
| O22-Zn2                                | 1.969(3)   | O23-Zn3                                | 2.048(3)   | O24-Zn2                                | 1.968(3)   |
| Bond                                   | Angles     | Bond                                   | Angles     | Bond                                   | Angles     |
| N6-Zn1-N5                              | 88.15(15)  | N8-Zn2-N7                              | 90.78(16)  | O24-Zn2-O18                            | 91.36(13)  |
| O14-Zn1-N5                             | 116.70(15) | O18-Zn2-N7                             | 83.62(14)  | O24-Zn2-O22                            | 115.30(15) |
| O14-Zn1-N6                             | 87.58(15)  | O18-Zn2-N8                             | 171.18(14) | O17-Zn3-O18                            | 79.65(11)  |
| O14-Zn1-O17                            | 92.88(13)  | O22-Zn2-N7                             | 117.85(16) | O19-Zn3-O17                            | 95.30(13)  |
| O14-Zn1-O20                            | 120.51(15) | O22-Zn2-N8                             | 94.13(15)  | O19-Zn3-O18                            | 163.17(14) |
| O17-Zn1-N5                             | 84.56(13)  | O22-Zn2-O18                            | 94.51(13)  | O19-Zn3-O21                            | 88.50(13)  |
| O17-Zn1-N6                             | 172.06(14) | O24-Zn2-N7                             | 126.84(15) | O19-Zn3-O23                            | 100.67(14) |
| O20-Zn1-N5                             | 122.79(15) | O24-Zn2-N8                             | 86.53(15)  | O21-Zn3-O17                            | 160.39(14) |
| O20-Zn1-N6                             | 93.60(14)  | O10-Zn4-N3                             | 123.44(16) | O13-Zn5-O1                             | 97.23(12)  |
| O20-Zn1-O17                            | 92.99(12)  | O10-Zn4-N4                             | 86.61(14)  | O13-Zn5-O9                             | 95.15(13)  |
| O21-Zn3-O18                            | 91.20(13)  | O10-Zn4-O8                             | 112.59(16) | N2-Zn6-N1                              | 89.08(16)  |
| O21-Zn3-O23                            | 102.65(15) | O10-Zn4-O9                             | 93.57(12)  | O1-Zn6-N1                              | 83.97(14)  |
| O23-Zn3-O17                            | 95.55(13)  | O1-Zn5-O9                              | 79.32(12)  | O1-Zn6-N2                              | 170.56(16) |
| O23-Zn3-O18                            | 95.82(13)  | O6-Zn5-O1                              | 93.50(14)  | O4-Zn6-N1                              | 122.03(16) |
| N3-Zn4-N4                              | 87.12(16)  | O6-Zn5-O9                              | 164.11(13) | O4-Zn6-N2                              | 86.92(14)  |
| O8-Zn4-N3                              | 123.96(17) | O6-Zn5-O13                             | 99.83(14)  | O4-Zn6-O1                              | 91.35(13)  |
| O8-Zn4-N4                              | 95.49(16)  | O7-Zn5-O1                              | 154.48(15) | O4-Zn6-O5                              | 117.40(15) |
| O8-Zn4-O9                              | 94.44(14)  | O7-Zn5-O6                              | 88.62(16)  | O5-Zn6-N1                              | 120.57(16) |
| O9-Zn4-N3                              | 83.74(14)  | O7-Zn5-O9                              | 91.92(14)  | O5-Zn6-N2                              | 94.77(17)  |
| O9-Zn4-N4                              | 169.17(15) | O7-Zn5-O13                             | 107.47(15) | O5-Zn6-O1                              | 94.26(14)  |
| Complex 2                              |            |                                        |            |                                        |            |
| Bond                                   | Lengths    | Bond                                   | Lengths    | Bond                                   | Lengths    |
| Sm1-O1                                 | 2.424(3)   | Sm1-O8                                 | 2.464(3)   | Sm1-O1 <sup>#1</sup>                   | 2.424(3)   |
| Sm1-O4                                 | 2.429(3)   | Sm1-O8 <sup>#1</sup>                   | 2.464(3)   | Sm1-O4 <sup>#1</sup>                   | 2.429(3)   |
| Sm1-O5                                 | 2.417(3)   | Sm1-O5 <sup>#1</sup>                   | 2.417(3)   |                                        |            |
| Bond                                   | Angles     | Bond                                   | Angles     | Bond                                   | Angles     |
| O1-Sm1-O1 <sup>#1</sup>                | 89.14(15)  | O4 <sup>#1</sup> -Sm1-O4               | 130.00(14) | O5 <sup>#1</sup> -Sm1-O4               | 145.23(10) |
| O1-Sm1-O4 <sup>#1</sup>                | 78.59(11)  | O4 <sup>#1</sup> -Sm1-O8 <sup>#1</sup> | 127.17(10) | O5-Sm1-O4                              | 64.28(10)  |
| O1 <sup>#1</sup> -Sm1-O4 <sup>#1</sup> | 66.15(10)  | O4-Sm1-O8                              | 127.17(10) | O5-Sm1-O4 <sup>#1</sup>                | 145.23(10) |
| O1 <sup>#1</sup> -Sm1-O4               | 78.59(10)  | O4 <sup>#1</sup> -Sm1-O8               | 88.09(10)  | O5 <sup>#1</sup> -Sm1-O4 <sup>#1</sup> | 64.28(10)  |

|                                        |            |                                        |            |                                        |            |
|----------------------------------------|------------|----------------------------------------|------------|----------------------------------------|------------|
| O1-Sm1-O4                              | 66.15(10)  | O4-Sm1-O8 <sup>#1</sup>                | 88.09(10)  | O5-Sm1-O5 <sup>#1</sup>                | 125.42(14) |
| O1-Sm1-O8 <sup>#1</sup>                | 89.54(11)  | O5-Sm1-O1 <sup>#1</sup>                | 91.14(10)  | O5 <sup>#1</sup> -Sm1-O8               | 78.92(10)  |
| O1-Sm1-O8                              | 165.94(10) | O5-Sm1-O1                              | 129.30(10) | O5 <sup>#1</sup> -Sm1-O8 <sup>#1</sup> | 64.72(10)  |
| O1 <sup>#1</sup> -Sm1-O8               | 89.54(11)  | O5 <sup>#1</sup> -Sm1-O1               | 91.14(10)  | O5-Sm1-O8                              | 64.72(10)  |
| O1 <sup>#1</sup> -Sm1-O8 <sup>#1</sup> | 165.94(10) | O5 <sup>#1</sup> -Sm1-O1 <sup>#1</sup> | 129.30(10) | O5-Sm1-O8 <sup>#1</sup>                | 78.92(10)  |
| O8 <sup>#1</sup> -Sm1-O8               | 95.06(15)  |                                        |            |                                        |            |

### Complex 3

| Bond                 | Lengths  | Bond                 | Lengths  | Bond                 | Lengths  |
|----------------------|----------|----------------------|----------|----------------------|----------|
| Eu1-O8               | 2.409(3) | Eu1-O4 <sup>#2</sup> | 2.408(3) | Eu1-O1 <sup>#2</sup> | 2.450(3) |
| Eu1-O8 <sup>#2</sup> | 2.409(3) | Eu1-O5               | 2.417(3) | Eu1-O1               | 2.450(3) |
| Eu1-O4               | 2.408(3) | Eu1-O5 <sup>#2</sup> | 2.417(3) |                      |          |

| Bond                                   | Angles     | Bond                                   | Angles     | Bond                                   | Angles     |
|----------------------------------------|------------|----------------------------------------|------------|----------------------------------------|------------|
| O8-Eu1-O8 <sup>#2</sup>                | 89.76(16)  | O8-Eu1-O5 <sup>#2</sup>                | 78.67(11)  | O5-Eu1-O1 <sup>#2</sup>                | 87.74(11)  |
| O8-Eu1-O4                              | 129.62(11) | O8 <sup>#2</sup> -Eu1-O5 <sup>#2</sup> | 66.13(10)  | O5 <sup>#2</sup> -Eu1-O1 <sup>#2</sup> | 127.84(10) |
| O8 <sup>#2</sup> -Eu1-O4               | 90.70(11)  | O4-Eu1-O5 <sup>#2</sup>                | 144.82(11) | O8-Eu1-O1                              | 165.44(10) |
| O8-Eu1-O4 <sup>#2</sup>                | 90.70(11)  | O4 <sup>#2</sup> -Eu1-O5 <sup>#2</sup> | 64.64(11)  | O8 <sup>#2</sup> -Eu1-O1               | 89.49(11)  |
| O8 <sup>#2</sup> -Eu1-O4 <sup>#2</sup> | 129.62(11) | O5-Eu1-O5 <sup>#2</sup>                | 129.80(15) | O4-Eu1-O1                              | 64.93(11)  |
| O4-Eu1-O4 <sup>#2</sup>                | 125.40(15) | O8-Eu1-O1 <sup>#2</sup>                | 89.49(11)  | O4 <sup>#2</sup> -Eu1-O1               | 78.64(11)  |
| O8-Eu1-O5                              | 66.13(10)  | O8 <sup>#2</sup> -Eu1-O1 <sup>#2</sup> | 165.44(10) | O5-Eu1-O1                              | 127.84(10) |
| O8 <sup>#2</sup> -Eu1-O5               | 78.67(11)  | O4-Eu1-O1 <sup>#2</sup>                | 78.64(11)  | O5 <sup>#2</sup> -Eu1-O1               | 87.74(11)  |
| O4-Eu1-O5                              | 64.64(11)  | O4 <sup>#2</sup> -Eu1-O1 <sup>#2</sup> | 64.93(11)  | O1 <sup>#2</sup> -Eu1-O1               | 94.84(16)  |
| O4 <sup>#2</sup> -Eu1-O5               | 144.82(11) |                                        |            |                                        |            |

### Complex 4

| Bond                 | Lengths  | Bond                 | Lengths  | Bond                 | Lengths  |
|----------------------|----------|----------------------|----------|----------------------|----------|
| Gd1-O4               | 2.412(5) | Gd1-O5 <sup>#3</sup> | 2.408(5) | Gd1-O1 <sup>#3</sup> | 2.406(5) |
| Gd1-O4 <sup>#3</sup> | 2.412(5) | Gd1-O8               | 2.442(5) | Gd1-O1               | 2.406(5) |
| Gd1-O5               | 2.408(5) | Gd1-O8 <sup>#3</sup> | 2.442(5) |                      |          |

| Bond                                   | Angles     | Bond                                   | Angles     | Bond                                   | Angles     |
|----------------------------------------|------------|----------------------------------------|------------|----------------------------------------|------------|
| O1 <sup>#3</sup> -Gd1-O1               | 89.9(3)    | O1-Gd1-O8 <sup>#3</sup>                | 89.49(19)  | O5-Gd1-O4 <sup>#3</sup>                | 144.43(19) |
| O1 <sup>#3</sup> -Gd1-O4 <sup>#3</sup> | 65.97(18)  | O1 <sup>#3</sup> -Gd1-O8               | 89.49(19)  | O5 <sup>#3</sup> -Gd1-O4 <sup>#3</sup> | 64.98(18)  |
| O1 <sup>#3</sup> -Gd1-O4               | 78.65(19)  | O1-Gd1-O8                              | 165.33(18) | O5 <sup>#3</sup> -Gd1-O4               | 144.43(19) |
| O1-Gd1-O4                              | 65.96(18)  | O4-Gd1-O4 <sup>#3</sup>                | 129.5(2)   | O5-Gd1-O5 <sup>#3</sup>                | 125.5(3)   |
| O1-Gd1-O4 <sup>#3</sup>                | 78.66(19)  | O4-Gd1-O8 <sup>#3</sup>                | 87.72(19)  | O5 <sup>#3</sup> -Gd1-O8 <sup>#3</sup> | 64.83(19)  |
| O1-Gd1-O5                              | 129.83(19) | O4 <sup>#3</sup> -Gd1-O8               | 87.72(19)  | O5 <sup>#3</sup> -Gd1-O8               | 78.79(19)  |
| O1 <sup>#3</sup> -Gd1-O5               | 90.41(19)  | O4 <sup>#3</sup> -Gd1-O8 <sup>#3</sup> | 128.14(18) | O5-Gd1-O8 <sup>#3</sup>                | 78.79(19)  |
| O1 <sup>#3</sup> -Gd1-O5 <sup>#3</sup> | 129.83(19) | O4-Gd1-O8                              | 128.14(18) | O5-Gd1-O8                              | 64.83(19)  |
| O1-Gd1-O5 <sup>#3</sup>                | 90.41(18)  | O5-Gd1-O4                              | 64.98(18)  | O8-Gd1-O8 <sup>#3</sup>                | 94.8(3)    |
| O1 <sup>#3</sup> -Gd1-O8 <sup>#3</sup> | 165.33(18) |                                        |            |                                        |            |

### Complex 5

| Bond    | Lengths  | Bond    | Lengths  | Bond   | Lengths  |
|---------|----------|---------|----------|--------|----------|
| O14-Tb1 | 2.378(7) | O13-Tb1 | 2.350(7) | O1-Tb1 | 2.446(9) |
| O4-Tb1  | 2.384(7) | O5-Tb1  | 2.386(8) | O8-Tb1 | 2.470(9) |
| O9-Tb1  | 2.420(8) | O12-Tb1 | 2.360(8) |        |          |

| Bond | Angles | Bond | Angles | Bond | Angles |
|------|--------|------|--------|------|--------|
|------|--------|------|--------|------|--------|

|           |          |             |          |             |          |
|-----------|----------|-------------|----------|-------------|----------|
| O1-Tb1-O8 | 164.6(3) | O12-Tb1-O1  | 89.9(3)  | O13-Tb1-O1  | 76.6(3)  |
| O4-Tb1-O1 | 65.3(2)  | O12-Tb1-O4  | 143.2(3) | O13-Tb1-O4  | 127.3(3) |
| O4-Tb1-O5 | 65.9(3)  | O12-Tb1-O5  | 127.1(3) | O13-Tb1-O5  | 143.3(3) |
| O4-Tb1-O8 | 129.9(3) | O12-Tb1-O8  | 77.5(3)  | O13-Tb1-O8  | 90.1(3)  |
| O4-Tb1-O9 | 87.3(3)  | O12-Tb1-O9  | 65.5(3)  | O13-Tb1-O9  | 130.0(3) |
| O5-Tb1-O1 | 130.6(3) | O12-Tb1-O14 | 130.4(3) | O13-Tb1-O12 | 66.2(3)  |
| O5-Tb1-O8 | 64.8(3)  | O14-Tb1-O5  | 86.4(3)  | O13-Tb1-O14 | 66.2(3)  |
| O5-Tb1-O9 | 79.5(3)  | O14-Tb1-O8  | 89.5(3)  | O14-Tb1-O1  | 92.0(3)  |
| O9-Tb1-O1 | 91.2(3)  | O14-Tb1-O9  | 163.8(3) | O14-Tb1-O4  | 79.7(3)  |
| O9-Tb1-O8 | 91.6(3)  |             |          |             |          |

### Complex 6

| Bond                                   | Lengths    | Bond                                   | Lengths    | Bond                     | Lengths    |
|----------------------------------------|------------|----------------------------------------|------------|--------------------------|------------|
| Dy1-O1                                 | 2.382(3)   | Dy1-O4                                 | 2.382(3)   | Dy1-O8                   | 2.426(3)   |
| Dy1-O1 <sup>#4</sup>                   | 2.382(3)   | Dy1-O5 <sup>#4</sup>                   | 2.374(3)   | Dy1-O8 <sup>#4</sup>     | 2.426(3)   |
| Dy1-O4 <sup>#4</sup>                   | 2.382(3)   | Dy1-O5                                 | 2.374(3)   |                          |            |
| Bond                                   | Angles     | Bond                                   | Angles     | Bond                     | Angles     |
| O1-Dy1-O1 <sup>#4</sup>                | 90.65(15)  | O4-Dy1-O1                              | 66.47(11)  | O4 <sup>#4</sup> -Dy1-O1 | 78.43(11)  |
| O1 <sup>#4</sup> -Dy1-O8 <sup>#4</sup> | 163.93(11) | O4 <sup>#4</sup> -Dy1-O1 <sup>#4</sup> | 66.47(11)  | O4-Dy1-O1 <sup>#4</sup>  | 78.44(11)  |
| O1 <sup>#4</sup> -Dy1-O8               | 89.32(11)  | O5 <sup>#4</sup> -Dy1-O1 <sup>#4</sup> | 130.55(11) | O5-Dy1-O4 <sup>#4</sup>  | 144.27(11) |
| O1-Dy1-O8 <sup>#4</sup>                | 89.32(11)  | O5-Dy1-O1                              | 130.55(11) | O5-Dy1-O4                | 65.28(11)  |
| O1-Dy1-O8                              | 163.93(11) | O5-Dy1-O1 <sup>#4</sup>                | 89.93(11)  | O5 <sup>#4</sup> -Dy1-O4 | 144.27(11) |
| O4-Dy1-O4 <sup>#4</sup>                | 129.51(15) | O5 <sup>#4</sup> -Dy1-O1               | 89.93(11)  | O5 <sup>#4</sup> -Dy1-O5 | 125.04(15) |
| O4-Dy1-O8                              | 129.12(11) | O5 <sup>#4</sup> -Dy1-O4 <sup>#4</sup> | 65.28(11)  | O5-Dy1-O8                | 65.53(11)  |
| O4 <sup>#4</sup> -Dy1-O8 <sup>#4</sup> | 129.11(11) | O5 <sup>#4</sup> -Dy1-O8 <sup>#4</sup> | 65.53(11)  | O5-Dy1-O8 <sup>#4</sup>  | 77.96(10)  |
| O4 <sup>#4</sup> -Dy1-O8               | 86.84(11)  | O5 <sup>#4</sup> -Dy1-O8               | 77.96(10)  | O8 <sup>#4</sup> -Dy1-O8 | 95.10(15)  |
| O4-Dy1-O8 <sup>#4</sup>                | 86.84(11)  |                                        |            |                          |            |

Symmetry transformations used to generate equivalent atoms: <sup>#1</sup> -x+1, y, -z+1/2; <sup>#2</sup> -x+1, y, -z+1/2; <sup>#3</sup> -x+1, y, -z+1/2; <sup>#4</sup> -x+1, y, -z+3/2.

**Table S2** Hydrogen bonding interactions [ $\text{\AA}^\circ$ ] for complexes **1-6**.

| D-H...A          | d(D-H) | d(H-A) | d(D-A)    | $\angle$ D-X-A | Sum             |
|------------------|--------|--------|-----------|----------------|-----------------|
| <b>Complex 1</b> |        |        |           |                |                 |
| O13-H13D...O4    | 0.84   | 1.94   | 2.738(5)  | 157            |                 |
| O13-H13C...O10   | 1.03   | 1.69   | 2.662(5)  | 155            |                 |
| O23-H23B...O24   | 0.84   | 1.88   | 2.676(5)  | 158            |                 |
| O23-H23A...O14   | 0.94   | 1.86   | 2.748(5)  | 157            |                 |
| C12-H12B...O5    | 0.99   | 2.29   | 3.228(7)  | 157            |                 |
| C23-H23C...O8    | 0.99   | 2.42   | 3.301(9)  | 147            |                 |
| C50-H50B...O20   | 0.99   | 2.38   | 3.233(6)  | 144            |                 |
| C16-H16...O16    | 0.95   | 2.49   | 3.413(6)  | 164            | 1-x,1-y,1-z     |
| C51-H51A...O10   | 0.99   | 2.56   | 3.505(6)  | 160            |                 |
| C54-H54...O12    | 0.95   | 2.58   | 3.439(6)  | 150            |                 |
| C78-H78A...O25   | 0.99   | 2.51   | 3.418(14) | 152            | 1+x,y,z         |
| <b>Complex 2</b> |        |        |           |                |                 |
| C13-H13A...O11   | 0.99   | 2.52   | 3.503(8)  | 173            |                 |
| O13-H13D...O21   | 0.87   | 2.11   | 2.42(3)   | 101            |                 |
| C24-H24...O7     | 0.95   | 2.42   | 2.877(6)  | 109            | 1-x,y,1/2-z     |
| C33-H33...O10    | 0.95   | 2.51   | 3.454(6)  | 173            | 1-x,y,1/2-z     |
| C36-H36C...O9    | 0.98   | 2.32   | 3.260(2)  | 160            | 1-x,y,1/2-z     |
| C23-H23A...O11   | 0.99   | 2.49   | 3.088(7)  | 118            | -1/2+x,-1/2+y,z |
| <b>Complex 3</b> |        |        |           |                |                 |
| C2-H2...O11      | 0.95   | 2.50   | 3.440(6)  | 172            | 1-x,y,1/2-z     |
| C5-H5...O2       | 0.95   | 2.43   | 2.877(9)  | 108            | 1-x,y,1/2-z     |
| C6-H6B...O9      | 0.99   | 2.47   | 3.066(8)  | 119            | -1/2+x,1/2+y,z  |
| C16-H16B...O9    | 0.99   | 2.53   | 3.509(9)  | 172            |                 |
| C16-H16B...N4    | 0.99   | 2.51   | 3.509(9)  | 100            |                 |
| C21-H21...O18    | 0.95   | 2.54   | 3.46(2)   | 165            | 1/2+x,-1/2+y,z  |
| C30A-H30F...O10  | 0.98   | 2.25   | 3.19(2)   | 161            | 1-x,y,1/2-z     |
| <b>Complex 4</b> |        |        |           |                |                 |
| C8-H8...O19      | 0.95   | 2.48   | 3.400(3)  | 165            | -1/2+x,1/2+y,z  |
| C11-H11...O2     | 0.95   | 2.59   | 2.977(12) | 105            | 1-x,y,3/2-z     |
| C13-H13B...O12   | 0.99   | 2.53   | 3.515(14) | 171            | 1-x,y,1/2-z     |
| C23-H23B...O12   | 0.99   | 2.45   | 3.062(13) | 119            | -1/2+x,-1/2+y,z |
| C24-H24...O7     | 0.95   | 2.40   | 2.885(13) | 111            | 1-x,y,3/2-z     |
| C29-H29...O10    | 0.95   | 2.48   | 3.12(2)   | 124            | 1-x,y,3/2-z     |
| <b>Complex 5</b> |        |        |           |                |                 |
| C2-H2...O13      | 0.95   | 2.55   | 3.220(14) | 128            |                 |
| C2-H2...O20      | 0.95   | 2.42   | 3.244(17) | 144            |                 |
| C22-H22A...O26   | 0.99   | 2.53   | 3.432(16) | 151            |                 |
| C33-H33...O12    | 0.95   | 2.50   | 3.244(14) | 136            |                 |
| C33-H33...O17    | 0.95   | 2.56   | 3.317(16) | 137            |                 |
| C45-H45...O2     | 0.95   | 2.47   | 3.092(16) | 123            |                 |

|                  |      |      |           |     |                 |
|------------------|------|------|-----------|-----|-----------------|
| C47–H47A···O22   | 0.99 | 2.36 | 3.281(15) | 155 |                 |
| C56–H56A···O18   | 0.99 | 2.50 | 3.273(18) | 134 |                 |
| C56–H56A···N3    | 0.99 | 2.62 | 2.955(17) | 100 |                 |
| C57–H57A···N4    | 0.99 | 2.32 | 2.759(17) | 106 |                 |
| C58–H58···O7     | 0.95 | 2.56 | 3.022(14) | 110 |                 |
| C69–H69A···O8    | 0.99 | 2.47 | 3.13(2)   | 124 |                 |
| O27–H27A···O23   | 0.90 | 2.30 | 3.097(18) | 148 |                 |
| O26–H26B···O19   | 0.88 | 2.04 | 2.732(14) | 135 | -x,1-y,1-z      |
| C39–H39···O17    | 0.95 | 2.42 | 3.331(18) | 162 | 1+x,y,z         |
| C46–H46B···O22   | 0.99 | 2.54 | 3.466(16) | 156 | 1-x,1-y,2-z     |
| C55–H55···O25    | 0.95 | 2.52 | 3.418(18) | 158 | -1+x,y,z        |
| <b>Complex 6</b> |      |      |           |     |                 |
| C8–H8···O19      | 0.93 | 2.47 | 3.392(2)  | 169 | -1/2+x,1/2+y,z  |
| C11–H11···O2     | 0.93 | 2.54 | 2.946(6)  | 107 | 1-x,y,3/2-z     |
| C13–H13B···O12   | 0.97 | 2.56 | 3.523(9)  | 172 |                 |
| C24–H24···O7     | 0.93 | 2.42 | 2.874(7)  | 110 | 1-x,y,3/2-z     |
| C29–H29···O10    | 0.93 | 2.52 | 3.443(6)  | 171 | 1-x,y,3/2-z     |
| C23–H23B···O12   | 0.97 | 2.47 | 3.061(8)  | 119 | -1/2+x,-1/2+y,z |

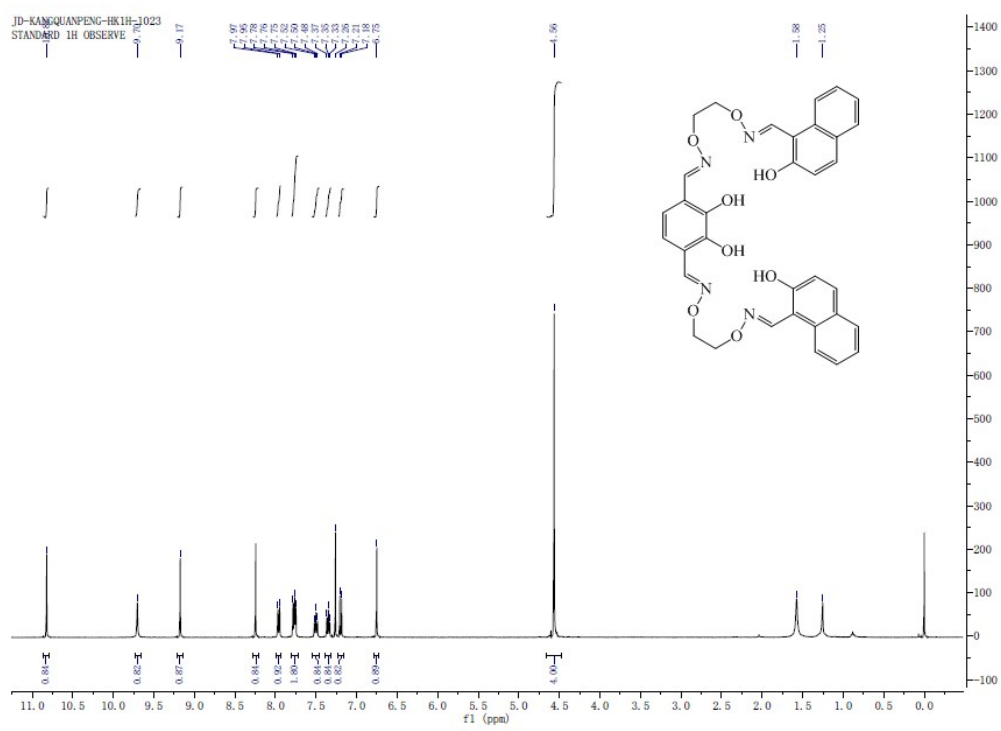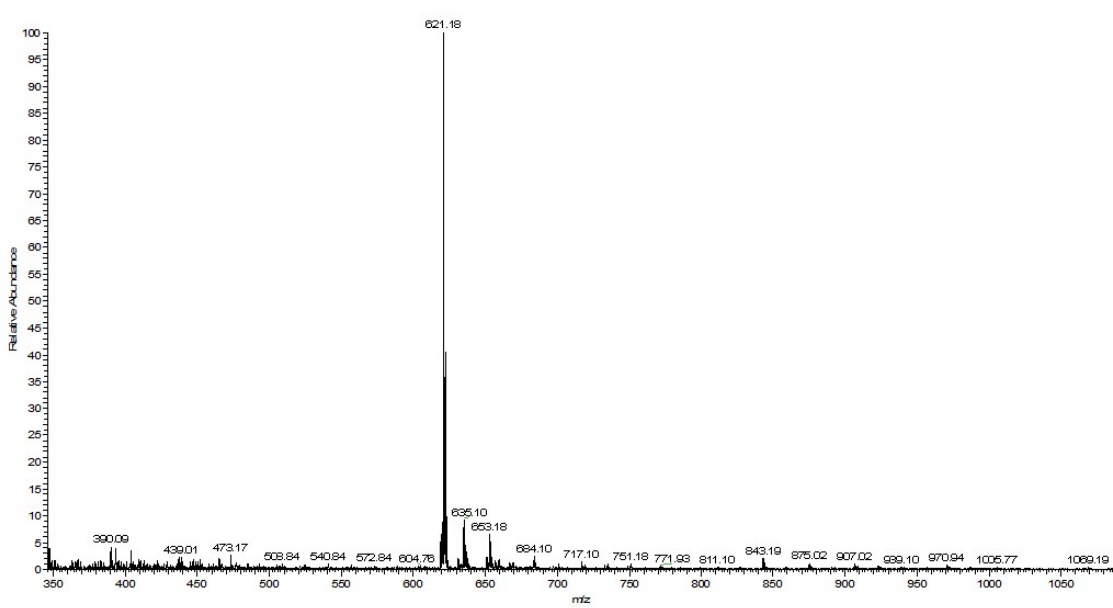

Fig. S1 <sup>1</sup>H NMR and MS of H<sub>4</sub>L.

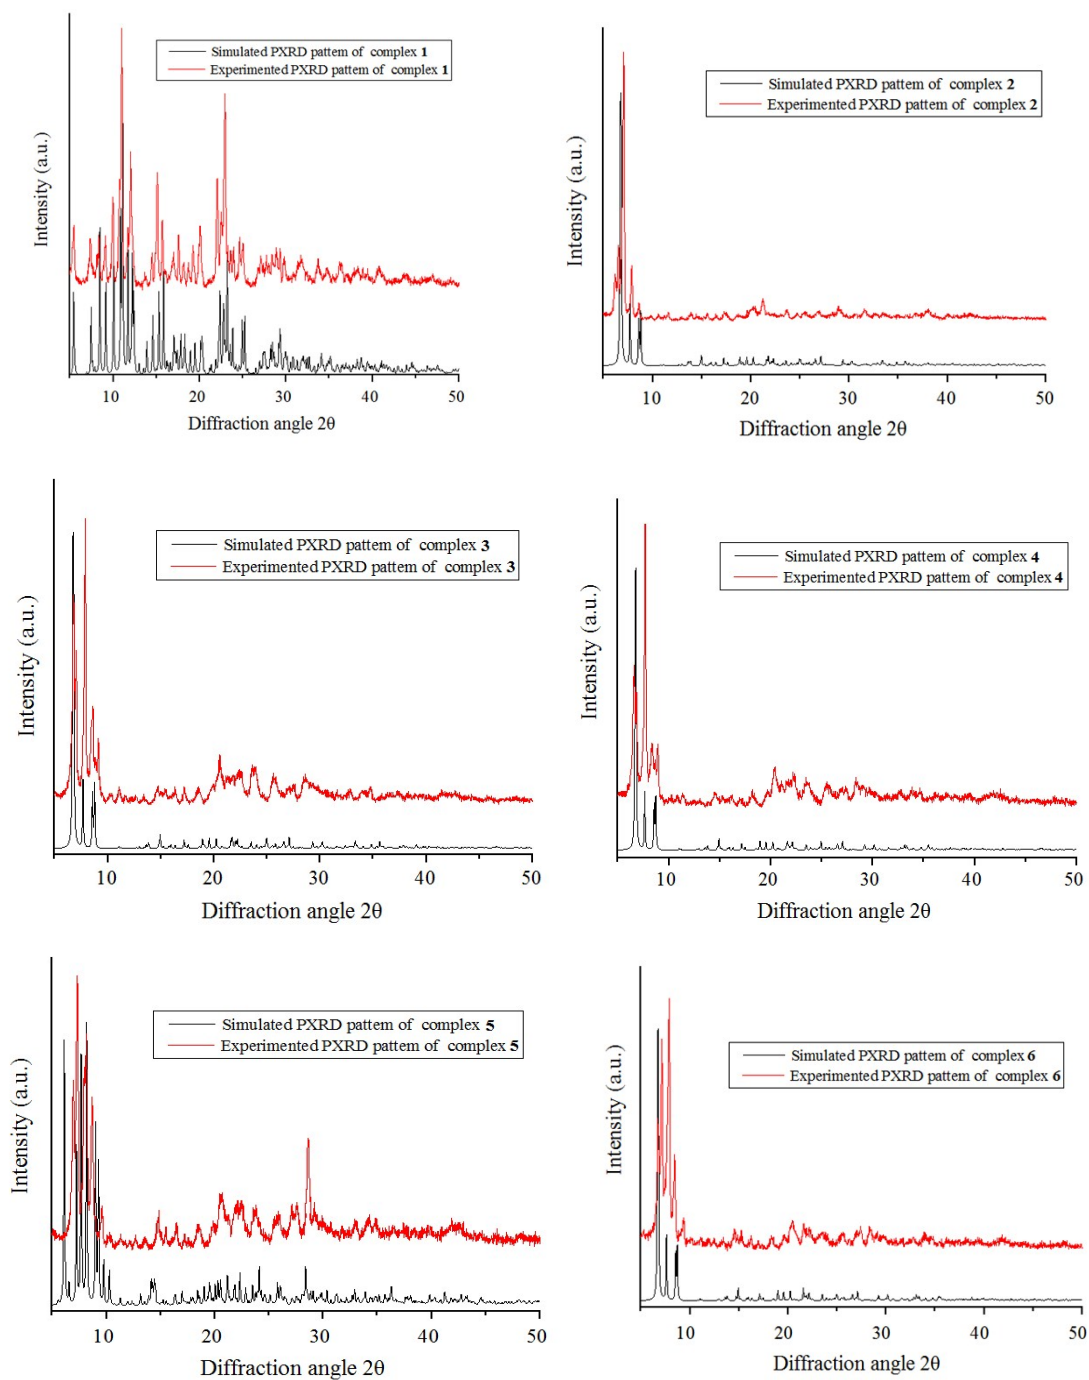

**Fig. S2** PXRD patterns for the complexes 1–6.
